# Supplementary material for: Spatio-temporal variability of snow water equivalent in the extra-tropical Andes Cordillera from distributed energy balance modeling and remotely sensed snow cover
Source: Copernicus journal article supplement (doi:10.5194/hess-20-411-2016), 2016-01-25
Supplement: Supplementary file 1 [file hess-20-411-2016-supplement.zip]

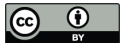

*Supplement of*

**Spatio-temporal variability of snow water equivalent in the extra-tropical Andes Cordillera from distributed energy balance modeling and remotely sensed snow cover**

**E. Cornwell et al.**

*Correspondence to:* J. McPhee ([jmcphee@u.uchile.cl](mailto:jmcphee@u.uchile.cl))

- [hess-20-411-2016-supplement-title-page.pdf](#)
- [Supplement.docx](#)

The copyright of individual parts of the supplement might differ from the CC-BY 3.0 licence.
